# Supplementary material for: Dysbiosis and predicted function of dental and ruminal microbiome associated with bovine periodontitis
Source: Front Microbiol. 2022 Aug 12;13:936021. doi: 10.3389/fmicb.2022.936021 (PMC9412940; doi:10.3389/fmicb.2022.936021)
Supplement: Supplementary file 1 [file Table_1.XLSX]

## Sheet: Planilha1
Supplementary table 1 . Description of the biofilm and ruminal fluid samples collected from cattle with periodontitis and those clinically healthy.
Code	Group	Biofilm sample	Biofilm sample included in the study*	Ruminal fluid sample
Bov1	Periodontitis	1	1	0
Bov2	Periodontitis	1	1	1
Bov3	Periodontitis	1	1	1
Bov4	Periodontitis	1	1	0
Bov5	Periodontitis	1	0	1
Bov6	Periodontitis	1	1	0
Bov7	Periodontitis	1	1	0
Bov8	Periodontitis	1	1	0
Bov9	Periodontitis	1	0	1
Bov10	Periodontitis	1	0	1
Bov11	Periodontitis	1	0	1
Bov12	Periodontitis	1	1	1
Bov13	Periodontitis	1	1	1
Bov14	Periodontitis	1	1	0
Bov15	Periodontitis	1	1	0
Bov16	Periodontitis	1	1	0
Bov17	Periodontitis	1	1	0
Bov18	Periodontitis	1	0	1
Bov19	Periodontitis	1	1	1
Bov20	Periodontitis	1	1	1
Bov21	Periodontitis	1	1	0
Bov22	Periodontitis	1	1	0
Bov23	Periodontitis	1	1	0
Bov24	Periodontitis	1	1	0
Bov25	Periodontitis	1	1	1
Bov26	Periodontitis	1	1	1
Bov27	Healthy	1	1	1
Bov28	Healthy	1	1	0
Bov29	Healthy	1	1	0
Bov30	Healthy	1	1	0
Bov31	Healthy	1	1	0
Bov32	Healthy	1	1	0
Bov33	Healthy	1	1	0
Bov34	Healthy	1	1	0
Bov35	Healthy	1	1	1
Bov36	Healthy	1	1	0
Bov37	Healthy	1	1	1
Bov38	Healthy	1	0	0
Bov39	Healthy	1	1	1
Bov40	Healthy	1	1	0
Bov41	Healthy	1	0	0
Bov42	Healthy	1	1	0
Bov43	Healthy	1	1	0
Bov44	Healthy	1	1	0
Bov45	Healthy	1	1	0
Bov46	Healthy	1	1	0
Bov47	Healthy	1	1	0
Bov48	Healthy	1	1	0
Bov49	Healthy	1	1	0
Bov50	Healthy	1	1	1
Bov51	Healthy	1	1	1
Bov52	Healthy	1	1	1
Bov53	Healthy	1	1	1
Bov54	Healthy	1	0	1
	Total	54	46	22
*Samples wih QC > 2950 reads
